# Supplementary material for: Diazotroph Diversity and Nitrogen Fixation in Summer Active Perennial Grasses in a Mediterranean Region Agricultural Soil
Source: PubMed Central journal article supplement (PMC6848460; doi:10.3389/fmolb.2019.00115), 2019-11-05

Table S1. Physico-chemical properties of soils, plant biomass and site weather from the experimental plots with different summer-active perennial grasses at Karoonda, South Australia during the 2014 and 2015 plant growth period.

| Property                 | Digitaria     | Panicum       | Rhodes grass  |
|--------------------------|---------------|---------------|---------------|
| pH-water                 | 7.11          | 6.94          | 6.93          |
| Organic C (%)            | 0.89 (0.08)   | 0.70 (0.04)   | 0.90 (0.08)   |
| Total N (%)              | 0.05 (0.007)  | 0.03 (0.005)  | 0.05 (0.007)  |
| C:N ratio                | 16.5 (0.7)    | 20.4 (1.5)    | 16.7 (0.5)    |
| Dissolved Org C (ug C/g) | 57.2 (0.7)    | 50.6 (2.3)    | 64.7 (8.2)    |
| Mineral N (ug N/g)       | 3.8 (0.08)    | 2.4 (0.0)     | 2.5 (0.3)     |
| Sand (%)                 | 74.7 (0.9)    | 76.2 (1.9)    | 76 (0.7)      |
| Clay (%)                 | 6.1 (0.6)     | 6.9 (0.6)     | 6.8 (0.4)     |
| CEC (cmol+)/kg           | 3.6 (0.3)     | 3.5 (0.4)     | 3.5 (0.4)     |
| Plant Biomass (t/ha)     |               |               |               |
| Dec-13                   | 0.116 (0.049) | 0.129 (0.028) | 0.183 (0.022) |
| Apr-14                   | 1.045 (0.318) | 1.447 (0.358) | 0.682 (0.217) |
| Jan-15                   | 0.248 (0.036) | 0.705 (0.101) | 0.683 (0.063) |
| Apr-15                   | 0.356 (0.088) | 0.863 (0.088) | 0.713 (0.104) |
| Rainfall (mm)            |               |               |               |
| Jan-April 2014           |               | 151           |               |
| Jan-April 2015           |               | 121           |               |
| Max Temp (oC)            |               | 29.1 (4.6)    |               |
| Min Temp (oC)            |               | 12.5 (2.4)    |               |

Table S2. Additional topological properties of molecular ecological networks for nifH gene harboring bacterial communities.

| <b>Network Indexes</b>                        | <b>Roots</b>          | <b>Leaf</b>                | <b>Stem</b>       | <b>All parts</b> |
|-----------------------------------------------|-----------------------|----------------------------|-------------------|------------------|
| Average path distance (GD)                    | 6.969                 | 9.788                      | 8.123             | 4.992            |
| Geodesic efficiency (E)                       | 0.174                 | 0.127                      | 0.15              | 0.237            |
| Harmonic geodesic distance (HD)               | 5.742                 | 7.9                        | 6.684             | 4.226            |
| Maximal degree                                | 18                    | 17                         | 23                | 27               |
| Nodes with max degree                         | OTU_2127;<br>OTU_2924 | OTU_2509                   | OTU_0096          | OTU_0293         |
| Centralization of degree (CD)                 | 0.021                 | 0.017                      | 0.026             | 0.069            |
| Maximal betweenness                           | 20592.558             | 37135.673                  | 64591.116         | 7924.244         |
| Nodes with max betweenness                    | OTU_2831              | OTU_0125                   | OTU_0096          | OTU_0293         |
| Centralization of betweenness (CB)            | 0.098                 | 0.12                       | 0.24              | 0.127            |
| Maximal stress centrality                     | 573641                | 4054851                    | 2964658           | 80019            |
| Nodes with max stress centrality              | OTU_0272              | OTU_4485                   | OTU_1729          | OTU_0293         |
| Centralization of stress centrality (CS)      | 2.673                 | 13.291                     | 11.02             | 1.296            |
| Maximal eigenvector centrality                | 0.285                 | 0.306                      | 0.312             | 0.374            |
| Nodes with max eigenvector centrality         | OTU_2127;OTU_2924     | OTU_0695;OTU_3180;OTU_2512 | OTU_0095;OTU_1924 | OTU_1090         |
| Centralization of eigenvector centrality (CE) | 0.276                 | 0.3                        | 0.304             | 0.349            |
| Density (D)                                   | 0.007                 | 0.006                      | 0.006             | 0.009            |
| Reciprocity                                   | 1                     | 1                          | 1                 | 1                |
| Transitivity (Trans)                          | 0.203                 | 0.175                      | 0.137             | 0.083            |
| Connectedness (Con)                           | 0.688                 | 0.792                      | 0.826             | 0.655            |
| Efficiency                                    | 0.992                 | 0.995                      | 0.994             | 0.99             |
| Hierarchy                                     | 0                     | 0                          | 0                 | 0                |
| Lubness                                       | 1                     | 1                          | 1                 | 1                |

Table S3. Topological properties of the empirical molecular ecological networks (MENs) of each plant part and their associated random MENs.

| Plant part | Empirical Network Indexes |                             |                                        |                   |                          | 100 Random Networks Indexes            |                   |                          |
|------------|---------------------------|-----------------------------|----------------------------------------|-------------------|--------------------------|----------------------------------------|-------------------|--------------------------|
|            | Similarity Threshold      | R <sup>2</sup> of Power Law | Average clustering coefficient (avgCC) | Average Path (GD) | Modularity (Fast greedy) | Average clustering coefficient (avgCC) | Average Path (GD) | Modularity (Fast greedy) |
| Roots      | 0.92                      | 0.742                       | 0.156                                  | 6.969             | 0.846                    | 0.010 ± 0.002                          | 4.192 ± 0.025     | 0.461 ± 0.004            |
| Stem       | 0.91                      | 0.729                       | 0.141                                  | 8.123             | 0.872                    | 0.008 ± 0.002                          | 4.412 ± 0.019     | 0.482 ± 0.005            |
| Leaf       | 0.91                      | 0.744                       | 0.141                                  | 9.788             | 0.908                    | 0.007 ± 0.002                          | 4.545 ± 0.023     | 0.498 ± 0.005            |
| All        | 0.72                      | 0.908                       | 0.097                                  | 4.992             | 0.685                    | 0.018 ± 0.006                          | 4.300 ± 0.068     | 0.577 ± 0.006            |

Table S4. Node topology of molecular ecological networks for NifH harboring bacterial communities.

| Node Classification | Plant part | OTU                              | BLAST - Genus                                           |                                                         |
|---------------------|------------|----------------------------------|---------------------------------------------------------|---------------------------------------------------------|
| Network Hub         | All        | 0293                             | Unidentified_bacterium_nif_cluster                      |                                                         |
| Module Hub          | All        | 1090                             | Unidentified_bacterium_nif_cluster                      |                                                         |
|                     |            | 0214                             | Burkholderia_sp_Ch1-1_ctg00023                          |                                                         |
|                     |            | 1353                             | Geobacter_uraniireducens_Rf4                            |                                                         |
|                     |            | 0502                             | Methylocella_silvestris_BL2                             |                                                         |
|                     |            | 0922                             | Opitutaceae_bacterium_TAV2_ctg796                       |                                                         |
|                     |            | 1751                             | Rubrivivax_benzoatilyticus_JA297                        |                                                         |
|                     |            | 0909                             | Leptothrix_cholodnii_SP-6                               |                                                         |
|                     | Roots      | 0772                             | Hyphomicrobium_sp_MC1                                   |                                                         |
|                     |            | 1039                             | Hyphomicrobium_sp_MC1                                   |                                                         |
|                     |            | 3020                             | Hyphomicrobium_sp_MC1                                   |                                                         |
|                     | Stem       | 0096                             | Bradyrhizobium_sp_OR5278                                |                                                         |
|                     |            | 3587                             | Geobacter_uraniireducens_Rf4                            |                                                         |
|                     |            | 5277                             | Geobacter_uraniireducens_Rf4                            |                                                         |
|                     |            | 0082                             | Hyphomicrobium_sp_MC1                                   |                                                         |
|                     |            | 2837                             | Hyphomicrobium_sp_MC1                                   |                                                         |
|                     |            | 0557                             | Hyphomicrobium_sp_MC1                                   |                                                         |
|                     |            | 2508                             | Hyphomicrobium_sp_MC1                                   |                                                         |
|                     |            | 0361                             | Novosphingobium_nitrogenifigens_DSM_19370_00023         |                                                         |
|                     |            | 0492                             | Novosphingobium_nitrogenifigens_DSM_19370_00023         |                                                         |
|                     |            | 2153                             | Opitutaceae_bacterium_TAV2_ctg796                       |                                                         |
|                     | 0843       | Rubrivivax_benzoatilyticus_JA297 |                                                         |                                                         |
|                     | Leaf       | 3619                             | H_seropedicae_nifD                                      |                                                         |
|                     |            | 0767                             | Geobacter_uraniireducens_Rf4                            |                                                         |
|                     |            | 0320                             | Methylobacterium_nodulans_OR5_2060                      |                                                         |
|                     |            | 2115                             | Bradyrhizobium_sp_OR5278                                |                                                         |
|                     |            | 3972                             | Leptothrix_cholodnii_SP-6                               |                                                         |
|                     |            | 1989                             | Leptothrix_cholodnii_SP-6                               |                                                         |
|                     |            | 0256                             | Geobacter_sp_FRC-32                                     |                                                         |
|                     | Connectors | All                              | 1860                                                    | Gluconacetobacter_diazotrophicus_PAI_5_complete_genome_ |
|                     |            |                                  | 2143                                                    | Bradyrhizobium_sp_OR5278                                |
| 1561                |            |                                  | Leptothrix_cholodnii_SP-6                               |                                                         |
| 1154                |            |                                  | Geobacter_uraniireducens_Rf4                            |                                                         |
| 3587                |            |                                  | Geobacter_uraniireducens_Rf4                            |                                                         |
| 1615                |            |                                  | Leptothrix_cholodnii_SP-6                               |                                                         |
| 0457                |            |                                  | Methylocella_silvestris_BL2                             |                                                         |
| Roots               |            | 1862                             | Leptothrix_cholodnii_SP-6                               |                                                         |
|                     |            | 0163                             | Burkholderia_sp_Ch1-1_ctg00023                          |                                                         |
|                     |            | 2546                             | Unidentified_bacterium_nif_cluster                      |                                                         |
|                     |            | 1490                             | Bradyrhizobium_elkaniifor_dinitrogen_reductase          |                                                         |
| Stem                |            | 4184                             | Gluconacetobacter_diazotrophicus_PAI_5_complete_genome_ |                                                         |
| Leaf                |            | 0125                             | Hyphomicrobium_sp_MC1                                   |                                                         |
|                     |            | 0520                             | Leptothrix_cholodnii_SP-6                               |                                                         |
|                     |            | 1635                             | Hyphomicrobium_sp_MC1                                   |                                                         |
|                     |            | 0301                             | Geobacter_sp_FRC-32                                     |                                                         |

Table S5. Phylotypes and closest relatives of NifH sequences associated with different plant parts of summer-active perennial grasses.

| Phylotype | Closest relative                          | Accession no. | Frambot        |       |            | Relative abundance (%) |      |      |      | Taxonomic description |
|-----------|-------------------------------------------|---------------|----------------|-------|------------|------------------------|------|------|------|-----------------------|
|           |                                           |               | Similarity (%) | Score | Framshifts | Leaf                   | Stem | Root | Mean |                       |
| OTU_367   | Hyphomicrobium sp. MC1                    | CCB66897      | 98             | 522   | 0          | 3.93                   | 3.52 | 4.19 | 3.88 | Alphaproteobacteria   |
| OTU_672   | Bradyrhizobium sp. ORS278                 | CAL79071      | 96             | 514   | 0          | 2.69                   | 3.20 | 1.73 | 2.54 | Alphaproteobacteria   |
| OTU_2909  | Opitutaceae bacterium TAV2                | EEG22235      | 93             | 474   | 2          | 2.61                   | 2.90 | 1.61 | 2.37 | Verrucomicrobia       |
| OTU_562   | Hyphomicrobium sp. MC1                    | CCB66897      | 95             | 461   | 3          | 1.93                   | 1.62 | 1.49 | 1.68 | Alphaproteobacteria   |
| OTU_388   | Methylocella silvestris BL2               | ACK52517      | 96             | 500   | 1          | 0.51                   | 0.45 | 3.55 | 1.50 | Alphaproteobacteria   |
| OTU_378   | Burkholderia (endosymbiotic)              | AAK26105      | 99             | 511   | 1          | 0.26                   | 0.26 | 3.44 | 1.32 | Betaproteobacteria    |
| OTU_1260  | Opitutaceae bacterium TAV2                | EEG22235      | 95             | 466   | 3          | 1.76                   | 1.05 | 0.76 | 1.19 | Verrucomicrobia       |
| OTU_328   | Methylocella silvestris BL2               | ACK52517      | 94             | 462   | 3          | 0.39                   | 0.13 | 2.79 | 1.10 | Alphaproteobacteria   |
| OTU_909   | Polaromonas naphthalenivorans CJ2         | ABM37652      | 99             | 509   | 1          | 1.34                   | 1.19 | 0.67 | 1.07 | Betaproteobacteria    |
| OTU_586   | Methylocella silvestris BL2               | ACK52517      | 96             | 502   | 1          | 0.55                   | 0.41 | 2.09 | 1.02 | Alphaproteobacteria   |
| OTU_323   | Gluconacetobacter diazotrophicus PAI 5    | CAP54379      | 95             | 502   | 1          | 1.25                   | 1.13 | 0.57 | 0.98 | Alphaproteobacteria   |
| OTU_370   | Xanthobacter autotrophicus Py2            | AB585347      | 96             | 502   | 1          | 1.12                   | 1.01 | 0.76 | 0.96 | Alphaproteobacteria   |
| OTU_1525  | Burkholderia (endosymbiotic)              | AAK26105      | 99             | 513   | 1          | 0.11                   | 0.07 | 2.45 | 0.88 | Betaproteobacteria    |
| OTU_520   | Leptothrix cholodnii SP-6                 | ACB33698      | 99             | 510   | 1          | 0.54                   | 0.93 | 1.12 | 0.86 | Betaproteobacteria    |
| OTU_365   | Bradyrhizobium sp. ORS278                 | CAL79071      | 99             | 505   | 1          | 0.93                   | 0.96 | 0.53 | 0.80 | Alphaproteobacteria   |
| OTU_2435  | Opitutaceae bacterium TAV2                | EEG22235      | 97             | 516   | 1          | 0.93                   | 1.00 | 0.47 | 0.80 | Verrucomicrobia       |
| OTU_359   | Polaromonas naphthalenivorans CJ2         | ABM37652      | 96             | 499   | 1          | 0.64                   | 0.94 | 0.77 | 0.78 | Betaproteobacteria    |
| OTU_49    | Methylocella silvestris BL2               | ACK52517      | 96             | 494   | 3          | 0.27                   | 0.10 | 1.96 | 0.78 | Alphaproteobacteria   |
| OTU_47    | Rubrivivax benzoatilyticus JA297          | EGJ10941      | 96             | 521   | 0          | 1.01                   | 0.68 | 0.59 | 0.76 | Betaproteobacteria    |
| OTU_59    | Bradyrhizobium sp. ORS278                 | CAL79071      | 98             | 504   | 1          | 0.58                   | 0.79 | 0.78 | 0.71 | Alphaproteobacteria   |
| OTU_11    | Pelobacter propionicus DSM 2379           | ABL01060      | 95             | 498   | 1          | 0.92                   | 0.65 | 0.48 | 0.68 | Deltaproteobacteria   |
| OTU_498   | Hyphomicrobium sp. MC1                    | CCB66897      | 97             | 479   | 2          | 0.23                   | 0.16 | 1.65 | 0.68 | Alphaproteobacteria   |
| OTU_217   | Leptothrix cholodnii SP-6                 | ACB33698      | 96             | 500   | 1          | 0.74                   | 0.74 | 0.55 | 0.68 | Betaproteobacteria    |
| OTU_71    | Geobacter uraniireducens Rf4              | ABQ25379      | 99             | 551   | 0          | 0.67                   | 0.89 | 0.43 | 0.66 | Deltaproteobacteria   |
| OTU_508   | Opitutaceae bacterium TAV2                | EEG22235      | 94             | 441   | 4          | 0.91                   | 0.60 | 0.40 | 0.64 | Verrucomicrobia       |
| OTU_830   | Geobacter uraniireducens Rf4              | ABQ25379      | 95             | 523   | 0          | 0.74                   | 0.60 | 0.56 | 0.63 | Deltaproteobacteria   |
| OTU_429   | Hyphomicrobium sp. MC1                    | CCB66897      | 97             | 479   | 2          | 0.37                   | 0.43 | 1.04 | 0.61 | Alphaproteobacteria   |
| OTU_608   | Novosphingobium nitrogenifigens DSM 19370 | EGD60366      | 96             | 521   | 0          | 0.64                   | 0.69 | 0.46 | 0.60 | Alphaproteobacteria   |
| OTU_454   | Novosphingobium nitrogenifigens DSM 19370 | EGD60366      | 94             | 487   | 1          | 0.57                   | 0.56 | 0.41 | 0.51 | Alphaproteobacteria   |
| OTU_149   | Herbaspirillum seropedicae SmR1           | CAA90932      | 94             | 511   | 0          | 0.37                   | 0.61 | 0.45 | 0.48 | Gammaaproteobacteria  |
| OTU_449   | Rhizobium sp. ORS571                      | AA26316       | 96             | 492   | 1          | 0.50                   | 0.65 | 0.26 | 0.47 | Alphaproteobacteria   |
| OTU_96    | Bradyrhizobium sp. ORS278                 | CAL79071      | 98             | 482   | 2          | 0.48                   | 0.60 | 0.30 | 0.46 | Alphaproteobacteria   |
| OTU_923   | Novosphingobium nitrogenifigens DSM 19370 | EGD60366      | 94             | 481   | 2          | 0.52                   | 0.45 | 0.40 | 0.46 | Alphaproteobacteria   |
| OTU_1467  | Novosphingobium nitrogenifigens DSM       | EGD60366      | 94             | 483   | 2          | 0.54                   | 0.40 | 0.37 | 0.44 | Alphaproteobacteria   |
| OTU_290   | Geobacter bemidjiensis Bem                | ACH89087      | 97             | 538   | 0          | 0.47                   | 0.43 | 0.33 | 0.41 | Deltaproteobacteria   |
| OTU_1118  | Opitutaceae bacterium TAV2                | EEG22235      | 95             | 456   | 4          | 0.40                   | 0.48 | 0.23 | 0.37 | Verrucomicrobia       |
| OTU_623   | Azospirillum amazonense Y2 01430          | EGX99768      | 99             | 527   | 0          | 0.27                   | 0.59 | 0.22 | 0.36 | Alphaproteobacteria   |
| OTU_74    | Hyphomicrobium sp. MC1                    | CCB66897      | 97             | 509   | 0          | 0.49                   | 0.16 | 0.39 | 0.35 | Alphaproteobacteria   |
| OTU_16    | Geobacter uraniireducens Rf4              | ABQ25379      | 95             | 505   | 1          | 0.53                   | 0.24 | 0.24 | 0.34 | Deltaproteobacteria   |
| OTU_487   | Opitutaceae bacterium TAV2                | EEG22235      | 90             | 425   | 3          | 0.47                   | 0.18 | 0.37 | 0.34 | Verrucomicrobia       |
| OTU_125   | Hyphomicrobium sp. MC1                    | CCB66897      | 97             | 481   | 2          | 0.45                   | 0.34 | 0.21 | 0.33 | Alphaproteobacteria   |
| OTU_568   | Hyphomicrobium sp. MC1                    | CCB66897      | 97             | 483   | 2          | 0.41                   | 0.36 | 0.22 | 0.33 | Alphaproteobacteria   |
| OTU_27    | Opitutaceae bacterium TAV2                | EEG22235      | 96             | 491   | 2          | 0.47                   | 0.31 | 0.19 | 0.32 | Verrucomicrobia       |
| OTU_332   | Hyphomicrobium sp. MC1                    | CCB66897      | 96             | 496   | 3          | 0.46                   | 0.30 | 0.18 | 0.31 | Alphaproteobacteria   |
| OTU_1022  | Polaromonas naphthalenivorans CJ2         | ABM37652      | 98             | 456   | 2          | 0.47                   | 0.18 | 0.28 | 0.31 | Betaproteobacteria    |
| OTU_63    | Methylobacterium nodulans ORS 2060        | ACL58883      | 96             | 482   | 2          | 0.36                   | 0.32 | 0.23 | 0.30 | Alphaproteobacteria   |
| OTU_99    | Methylocella silvestris BL2               | ACK52517      | 95             | 475   | 2          | 0.14                   | 0.08 | 0.68 | 0.30 | Alphaproteobacteria   |
| OTU_238   | Burkholderia (endosymbiotic)              | AAK26105      | 93             | 477   | 1          | 0.01                   | 0.04 | 0.85 | 0.30 | Betaproteobacteria    |
| OTU_140   | Geobacter bemidjiensis Bem                | ACH89087      | 98             | 521   | 2          | 0.23                   | 0.33 | 0.28 | 0.28 | Deltaproteobacteria   |
| OTU_437   | Burkholderia sp. ChL-1                    | EFG73464      | 100            | 535   | 0          | 0.34                   | 0.37 | 0.13 | 0.28 | Betaproteobacteria    |
| OTU_29    | Methylocella silvestris BL2               | ACK52517      | 94             | 452   | 4          | 0.10                   | 0.04 | 0.68 | 0.27 | Alphaproteobacteria   |
| OTU_1357  | Polaromonas naphthalenivorans CJ2         | ABM37652      | 99             | 508   | 1          | 0.27                   | 0.37 | 0.18 | 0.27 | Betaproteobacteria    |
| OTU_511   | Opitutaceae bacterium TAV2                | EEG22235      | 96             | 491   | 2          | 0.33                   | 0.33 | 0.15 | 0.27 | Verrucomicrobia       |
| OTU_14    | Leptothrix cholodnii SP-6                 | ACB33698      | 99             | 510   | 1          | 0.14                   | 0.41 | 0.22 | 0.26 | Betaproteobacteria    |
| OTU_112   | Dechloromonas aromatica RCB               | AA246164      | 98             | 536   | 0          | 0.23                   | 0.33 | 0.20 | 0.25 | Betaproteobacteria    |
| OTU_503   | Pelobacter propionicus DSM 2379           | ABL01060      | 95             | 488   | 2          | 0.39                   | 0.22 | 0.14 | 0.25 | Deltaproteobacteria   |
| OTU_30    | Hyphomicrobium sp. MC1                    | CCB66897      | 96             | 515   | 0          | 0.25                   | 0.27 | 0.23 | 0.25 | Alphaproteobacteria   |
| OTU_1376  | Burkholderia (endosymbiotic)              | AAK26105      | 98             | 499   | 2          | 0.06                   | 0.04 | 0.64 | 0.25 | Betaproteobacteria    |
| OTU_142   | Burkholderia (endosymbiotic)              | AAK26105      | 99             | 529   | 0          | 0.02                   | 0.00 | 0.71 | 0.24 | Betaproteobacteria    |
| OTU_644   | Burkholderia sp. ChL-1                    | EFG73464      | 98             | 505   | 1          | 0.26                   | 0.20 | 0.27 | 0.24 | Betaproteobacteria    |
| OTU_12    | Dechloromonas aromatica RCB               | AA246164      | 94             | 504   | 1          | 0.45                   | 0.09 | 0.19 | 0.24 | Betaproteobacteria    |
| OTU_573   | Opitutaceae bacterium TAV2                | EEG22235      | 95             | 480   | 2          | 0.28                   | 0.27 | 0.17 | 0.24 | Verrucomicrobia       |
| OTU_329   | Bradyrhizobium sp. ORS278                 | CAL79071      | 99             | 507   | 1          | 0.26                   | 0.30 | 0.15 | 0.24 | Alphaproteobacteria   |
| OTU_337   | Geobacter uraniireducens Rf4              | ABQ25379      | 94             | 478   | 2          | 0.21                   | 0.24 | 0.22 | 0.23 | Deltaproteobacteria   |
| OTU_458   | Geobacter uraniireducens Rf4              | ABQ25379      | 94             | 474   | 2          | 0.34                   | 0.19 | 0.11 | 0.21 | Deltaproteobacteria   |
| OTU_698   | Burkholderia sp. ChL-1                    | EFG73464      | 98             | 519   | 1          | 0.07                   | 0.26 | 0.30 | 0.21 | Betaproteobacteria    |
| OTU_661   | Azospirillum amazonense Y2 01430          | EGX99768      | 99             | 505   | 1          | 0.18                   | 0.31 | 0.11 | 0.20 | Alphaproteobacteria   |

Table S6. Niche values<sup>&</sup> for plant-C and plant-N as indicators of abundance-weighted mean of the environmental variables for each *nifH*-OTU in the community and the significance is based on a  $p < 0.05$  (two-tailed test).

| Plant C niche values |                |        |        |                            |         |
|----------------------|----------------|--------|--------|----------------------------|---------|
| Observed             | Mean.Simulated | LowCI  | UppCI  | Significance at $P < 0.05$ |         |
| OTU_2909             | 293.73         | 281.99 | 269.10 | 296.15                     | Non-sig |
| OTU_1017             | 299.45         | 282.16 | 261.46 | 302.94                     | Non-sig |
| OTU_2435             | 298.08         | 282.04 | 269.18 | 295.88                     | Higher  |
| OTU_1118             | 296.46         | 282.20 | 263.50 | 300.67                     | Non-sig |
| OTU_1260             | 300.82         | 281.74 | 265.36 | 298.47                     | Higher  |
| OTU_1189             | 310.05         | 281.25 | 243.56 | 314.21                     | Non-sig |
| OTU_1353             | 284.51         | 280.67 | 194.04 | 355.49                     | Non-sig |
| OTU_1151             | 287.29         | 282.27 | 236.90 | 324.82                     | Non-sig |
| OTU_1525             | 162.64         | 280.58 | 219.62 | 338.41                     | Lower   |
| OTU_1376             | 185.69         | 280.35 | 212.93 | 337.23                     | Lower   |
| OTU_1035             | 343.07         | 281.79 | 110.77 | 394.46                     | Non-sig |
| OTU_1308             | 223.86         | 282.17 | 207.59 | 351.14                     | Non-sig |
| OTU_1015             | 191.96         | 280.75 | 221.14 | 337.39                     | Lower   |
| OTU_2080             | 236.38         | 281.00 | 225.52 | 330.93                     | Non-sig |
| OTU_1022             | 274.67         | 282.26 | 227.03 | 338.05                     | Non-sig |
| OTU_1367             | 291.94         | 281.63 | 247.90 | 313.99                     | Non-sig |
| OTU_1357             | 294.65         | 281.71 | 262.83 | 300.45                     | Non-sig |
| OTU_1862             | 293.18         | 281.17 | 225.05 | 327.32                     | Non-sig |
| OTU_1467             | 289.92         | 281.84 | 261.12 | 303.12                     | Non-sig |
| OTU_1219             | 284.98         | 280.83 | 250.08 | 312.36                     | Non-sig |
| OTU_1347             | 297.14         | 281.44 | 259.34 | 305.26                     | Non-sig |
| OTU_1162             | 298.73         | 281.28 | 238.04 | 323.12                     | Non-sig |
| OTU_1490             | 288.94         | 281.46 | 242.12 | 320.48                     | Non-sig |
| OTU_1032             | 277.15         | 280.87 | 227.13 | 325.58                     | Non-sig |
| OTU_1975             | 277.48         | 280.88 | 253.96 | 309.02                     | Non-sig |
| OTU_1292             | 282.38         | 281.46 | 252.94 | 308.22                     | Non-sig |
| OTU_1599             | 300.10         | 280.98 | 219.93 | 339.32                     | Non-sig |
| OTU_1186             | 301.09         | 281.77 | 265.78 | 298.12                     | Higher  |
| Plant N niche values |                |        |        |                            |         |
| OTU_2909             | 12.92          | 12.47  | 11.82  | 13.06                      | Non-sig |
| OTU_1017             | 13.06          | 12.47  | 11.54  | 13.30                      | Non-sig |
| OTU_2435             | 13.08          | 12.48  | 11.85  | 13.08                      | Higher  |
| OTU_1118             | 13.02          | 12.47  | 11.62  | 13.28                      | Non-sig |
| OTU_1260             | 13.46          | 12.50  | 11.78  | 13.20                      | Higher  |
| OTU_1189             | 14.39          | 12.53  | 11.10  | 14.14                      | Higher  |
| OTU_1353             | 13.45          | 12.45  | 9.16   | 16.26                      | Non-sig |
| OTU_1151             | 12.50          | 12.45  | 10.50  | 14.46                      | Non-sig |
| OTU_1525             | 8.76           | 12.42  | 10.02  | 15.19                      | Lower   |
| OTU_1376             | 9.64           | 12.43  | 9.94   | 15.16                      | Lower   |
| OTU_1035             | 13.35          | 12.68  | 6.70   | 20.27                      | Non-sig |
| OTU_1308             | 10.02          | 12.49  | 9.55   | 15.86                      | Non-sig |
| OTU_1015             | 10.20          | 12.42  | 9.99   | 15.09                      | Non-sig |
| OTU_2080             | 10.16          | 12.49  | 10.16  | 15.02                      | Lower   |
| OTU_1022             | 12.68          | 12.48  | 10.01  | 14.86                      | Non-sig |
| OTU_1367             | 12.30          | 12.50  | 10.98  | 14.04                      | Non-sig |
| OTU_1357             | 12.62          | 12.49  | 11.69  | 13.28                      | Non-sig |
| OTU_1862             | 11.43          | 12.52  | 10.28  | 14.98                      | Non-sig |
| OTU_1467             | 12.64          | 12.47  | 11.55  | 13.45                      | Non-sig |
| OTU_1219             | 12.16          | 12.49  | 11.21  | 13.85                      | Non-sig |
| OTU_1347             | 13.04          | 12.49  | 11.52  | 13.45                      | Non-sig |
| OTU_1162             | 13.83          | 12.50  | 10.83  | 14.53                      | Non-sig |
| OTU_1490             | 12.54          | 12.44  | 10.85  | 14.10                      | Non-sig |
| OTU_1032             | 11.96          | 12.45  | 10.53  | 14.87                      | Non-sig |
| OTU_1975             | 12.60          | 12.48  | 11.26  | 13.62                      | Non-sig |
| OTU_1292             | 12.80          | 12.49  | 11.34  | 13.57                      | Non-sig |
| OTU_1599             | 12.20          | 12.51  | 9.73   | 15.30                      | Non-sig |
| OTU_1186             | 12.98          | 12.50  | 11.81  | 13.26                      | Non-sig |

<sup>&</sup>Estimated as per Guillem Salazar (2019). EcolUtils: Utilities for community ecology analysis. R package version 0.1. <https://github.com/GuillemSalazar/EcolUtils>.

Figure S1. Venn diagram showing number of unique and shared OTUs of total OTUs between different plant parts for individual grass species.

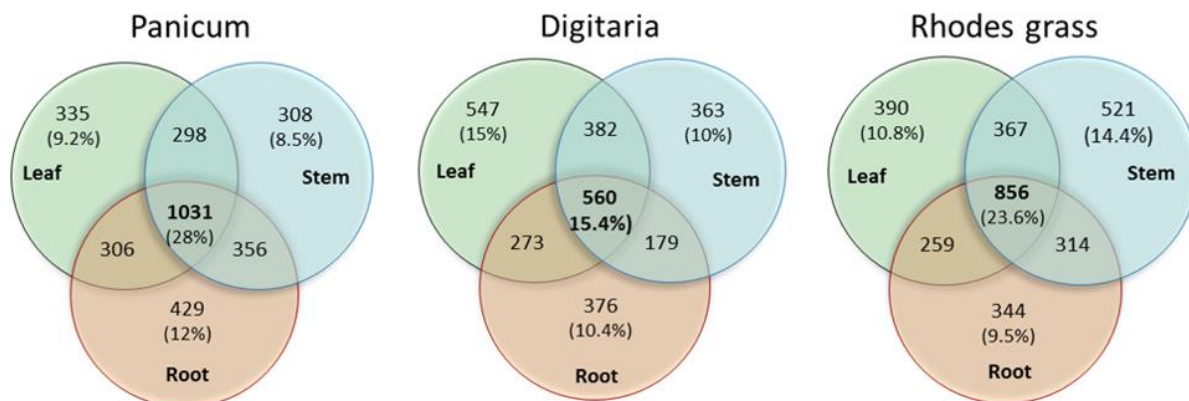

Figure S2. Relative abundances (averages of replicates) of top 17 diazotrophic (*nifH*-gene harbouring) genera accounting for >85 of total OTU abundance in different plant parts (leaf, stem and root) for the summer-active perennial grasses at Karoonda in Australia (this study) and the Switchgrass at the Kellogg Biological Station in USA (adopted from the data reported by Roley et al., 2019).

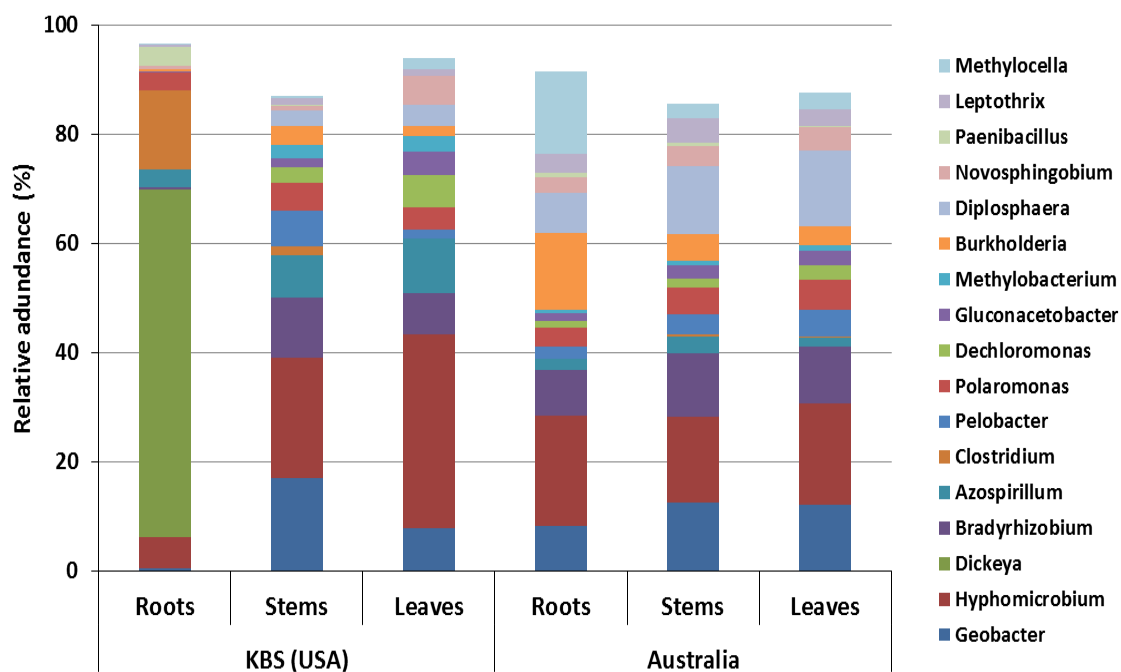

Figure S3. Relative abundances (averages of replicates) diazotrophic communities in (A) different plant parts (leaf, stem and root) and (B) above- vs. below-ground parts for the summer-active perennial grasses at Karoonda in Australia. Asterix \* indicates significant differences between the different plant parts at  $P < 0.05$ .

(A) Individual plant parts

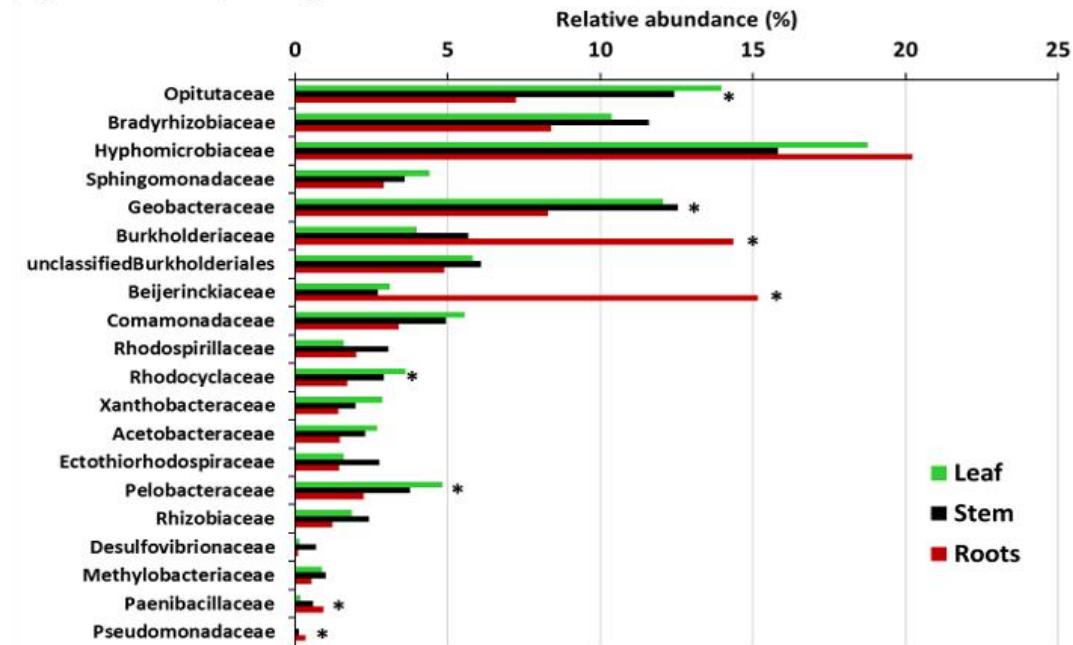

(B) Above vs. Below ground

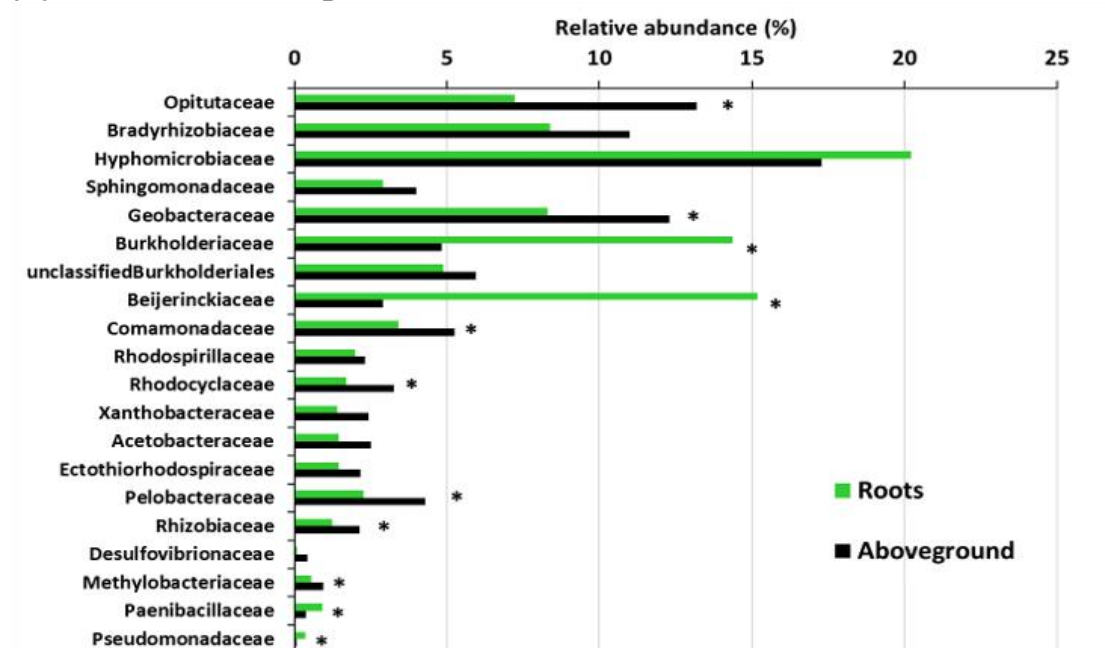



Figure S4. Diazotroph (*nifH*-gene harbouring) community network generated based on RMT-based network analysis. Circles represent nodes whose size indicates connectivity, node colour represents taxonomy at the genus level. Edges indicate co-occurrence between nodes coloured either blue for positive or red for negative. Each circular grouping is a module. Each circular grouping is a module, modules containing at least five nodes are identified by their assigned number.

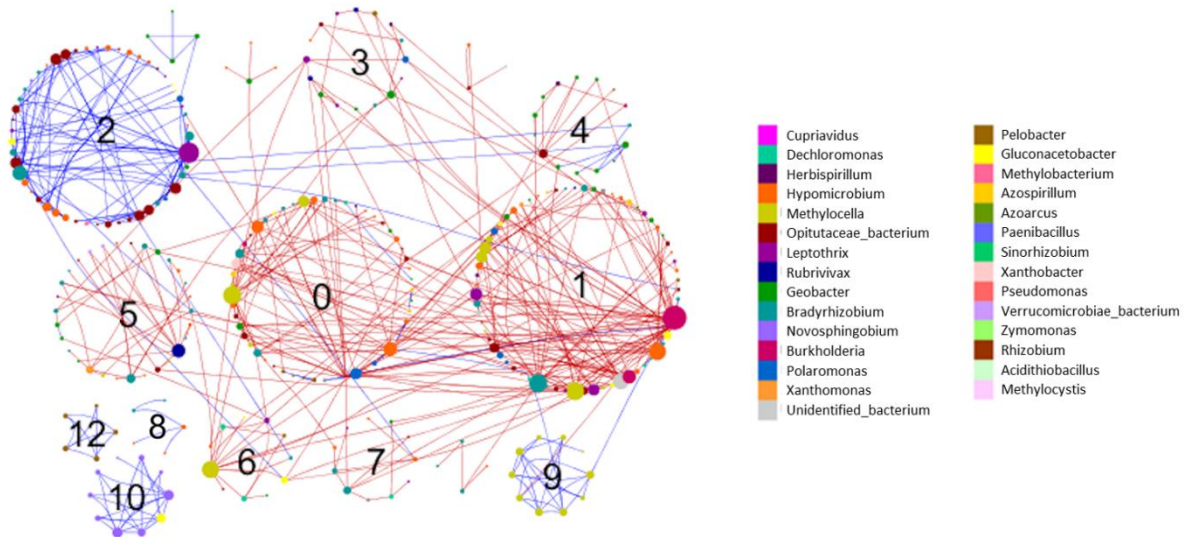

Figure S5. Topological roles of OTUs based on distribution of nodes on  $Z_i$  (within module) vs.  $P_i$  (among module) connectivity scatter plots for the leaf, stem and root samples. (A) For individual plant part; each color represents an OTU from the three networks and (B) For the entire endophytic *nifH*-gene harbouring community.

(A) Individual plant parts

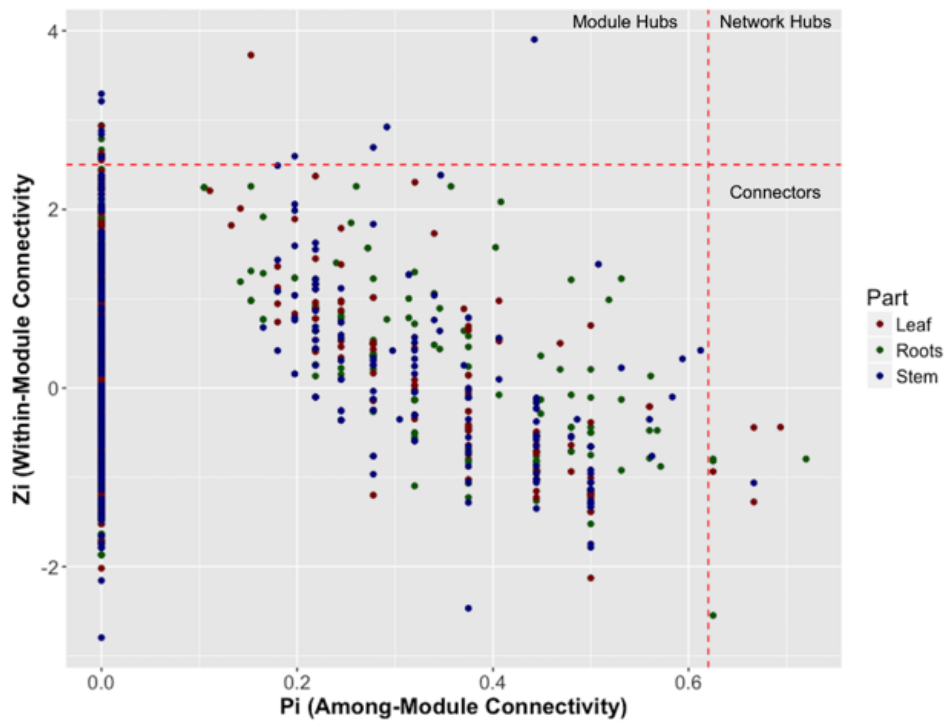

(B) All plant parts

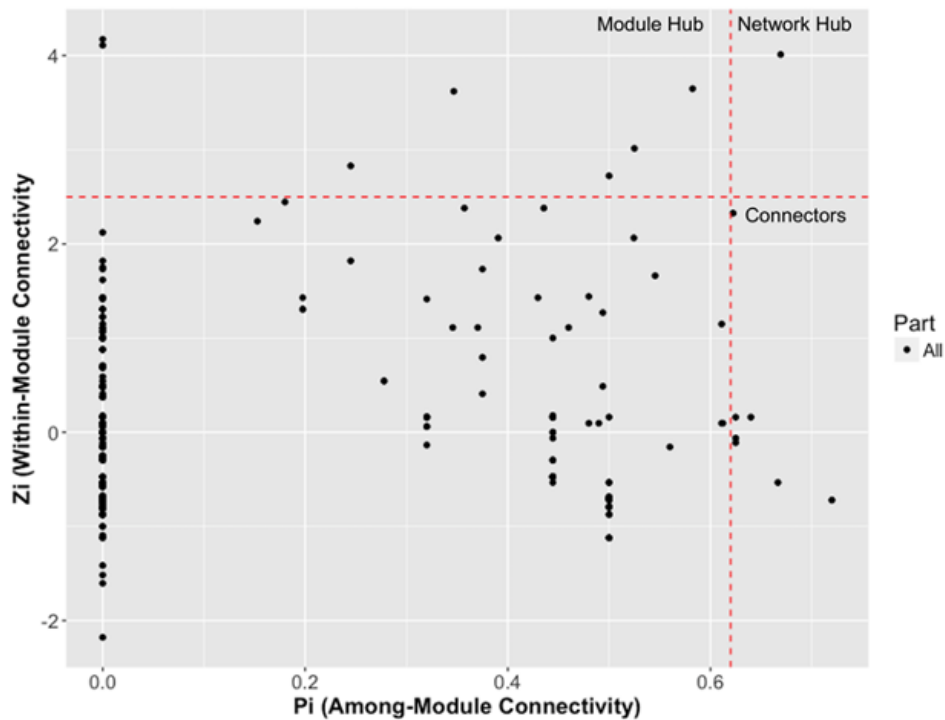

Figure S6. Pearson correlation resulting from a Mantel correlogram between the pairwise matrix of OTU niche distances and phylogenetic distances with 999 permutations. Significant correlations ( $p < 0.05$ , solid squares) indicate phylogenetic signal in species ecological niches.

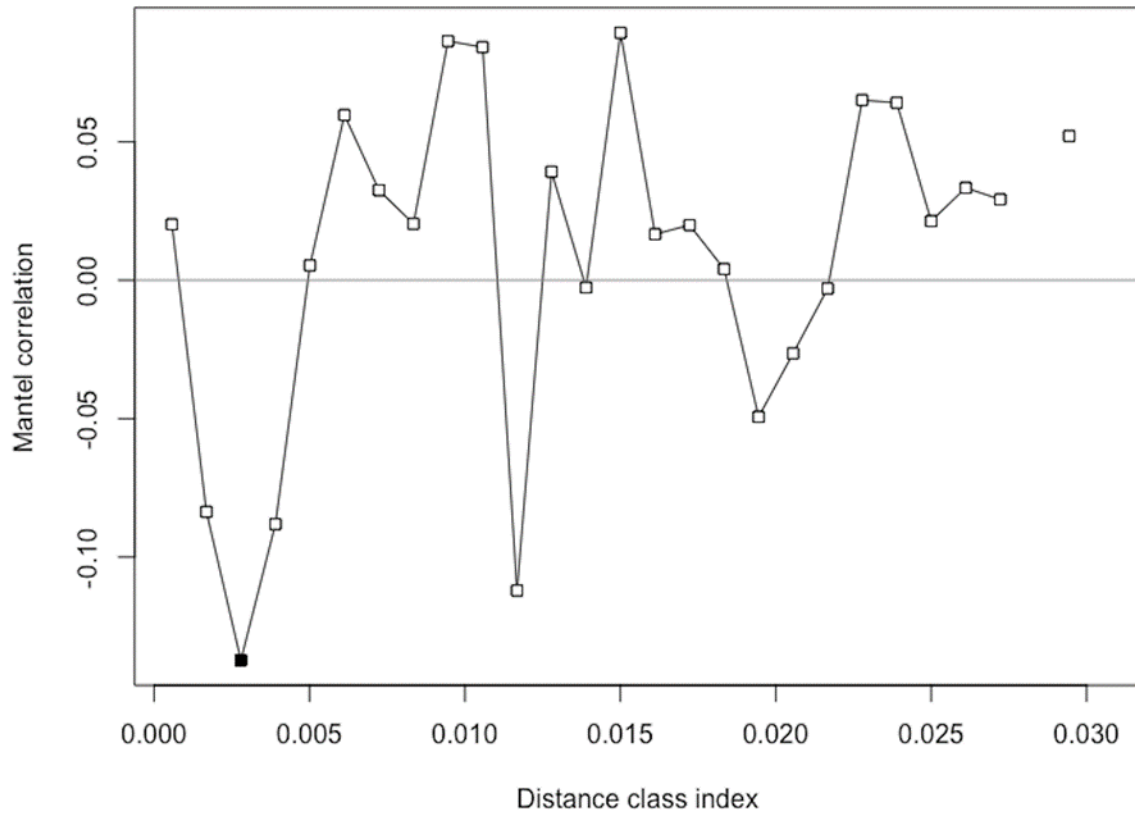

Figure S7. The net relatedness index (NRI) and nearest taxon index (NTI) for three plant parts for three plant species. Positive NRI or NTI indicates phylogenetic clustering and negative NRI or NTI indicates phylogenetic evenness.

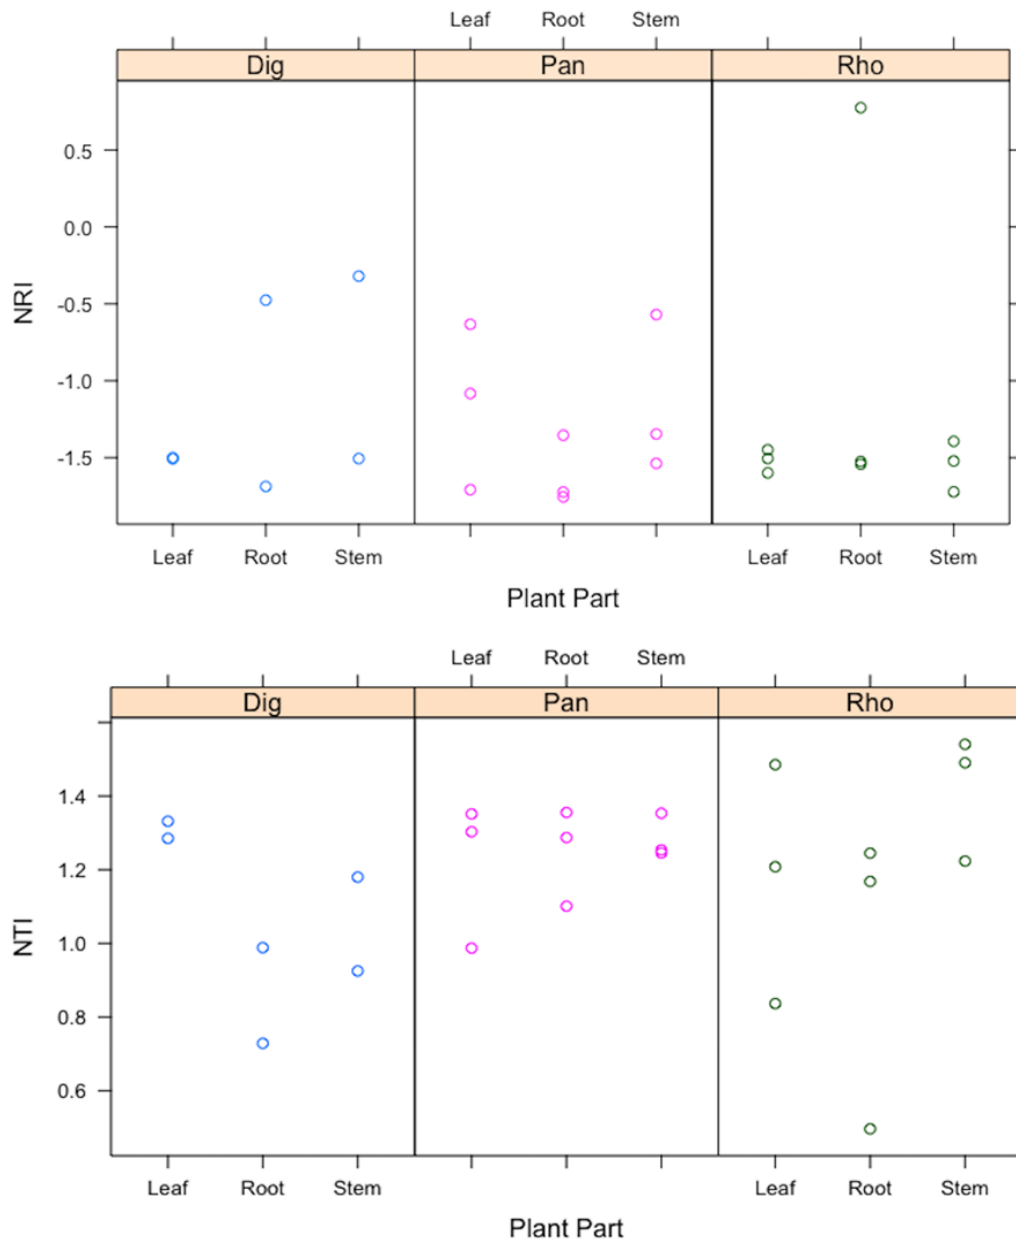

Supplement: Table_1.pdf [file Table_1.pdf]
